# Supplementary material for: Purinergic signaling in cochlear supporting cells reduces hair cell excitability by increasing the extracellular space
Source: eLife. 2020 Jan 8;9:e52160. doi: 10.7554/eLife.52160 (PMC7015667; doi:10.7554/eLife.52160)
Supplement: Figure 1—figure supplement 1—source data 1. [file elife-52160-fig1-figsupp1-data1.xlsx]

## Sheet: Sheet1
Figure 1 - Figure supplement 1 Source data
Experimental notes: performed in P6-8 mice, near physiological temperature (32-34C)
Panel B - Raw measured values (ISC frequency - events/min)							Panel B - Raw measured values (ISC amplitude -pA)							Panel B - Raw measured values (ISC integral -pC)							Panel D - Raw measured values (Crenations per minute)							Panel D - Raw measured values (Crenations area)
	Control	Ryanodine (paired)						Control	Ryanodine (paired)						Control	Ryanodine (paired)						Control	Ryanodine (paired)						Control	Ryanodine (paired)
	17.8	17.6						775.45	763.066						511.908	579.305						3.8	3.6						1780.55	1446.76
	21	23.4						793.772	635.643						577.75	452.51						2.6	3						1874.25	1711.62
	22	19.8						943.33	759.754						825.507	592.883						3.8	2.6						1481.16	1686.54
	17.8	16.8						472.118	371.755						257.283	205.287						2.8	3.2						1521.17	820.516
	20.8	18.4						481.359	406.13						272.282	240.138						3.8	3.6						1309.63	885.386
	13.4	14.4						349.858	312.737						176.709	161.693						2	2.4						1678.74	848.196
	11	13.4						289.477	260.628						176.81	159.187						2.2	1.8						578.092	1039.32
	8.2	8.6						327.603	346.718						225.425	226.387						1.2	2.6						1308.68	980.2
	15.4	14.2						367.726	528.525						212.301	390.078						2	2						1037.75	1235.59
	17.2	16.2						289.758	350.268						178.592	228.212						2.2	2						1707.71	2547.19
	16.6	13.4						406.425	428.215						205.528	214.196						2	2.8						818.795	1209.66
																						2.4	1.8						1058.57	1914.81
n	11	11					n	11	11					n	11	11						2.6	3						1905.69	1232.68
mean	16.4727	16.0182					mean	499.716	469.404					mean	329.1	313.625
95% CI	2.52677	2.30605					95% CI	135.646	104.764					95% CI	126.577	95.7576					n	13	13					n	13	13
																					mean	2.56923	2.64615					mean	1389.29	1350.65
Statistical test: two-tailed paired Student's t test							Statistical test: two-tailed paired Student's t test							Statistical test: two-tailed paired Student's t test							95% CI	0.436789	0.341368					95% CI	227.146	273.311
p-value	0.43735						p-value	0.331543						p-value	0.635336
																					Statistical test: two-tailed paired Student's t test							Statistical test: two-tailed paired Student's t test
																					p-value	0.682199						p-value	0.811644
