# Supplementary material for: Purinergic signaling in cochlear supporting cells reduces hair cell excitability by increasing the extracellular space
Source: eLife. 2020 Jan 8;9:e52160. doi: 10.7554/eLife.52160 (PMC7015667; doi:10.7554/eLife.52160)
Supplement: Figure 1—source data 1. [file elife-52160-fig1-data1.xlsx]

## Sheet: Sheet1
Figure 1 - Source data
Experimental notes: performed in P6-8 rats, room temperature
Panel C - Raw measured values (ISC frequency - events/min)							Panel D - Raw measured values (ISC amplitude -pA)							Panel E - Raw measured values (ISC integral -pC)							Panel F - Raw measured values (Crenations per minute)
	Control	BAPTA	Thapsigargin	U73122	U73343			Control	BAPTA	Thapsigargin	U73122	U73343			Control	BAPTA	Thapsigargin	U73122	U73343			Control	BAPTA	Thapsigargin	U73122	U73343
	10	1.8	0.6	1.6	7.1			682.595	61.9645	54.2316	46.2476	145.959			538.878	26.3384	5.90106	15.6044	61.6703			1.5	0.2	0	0.1	2.6
	10.2	1.9	0.5	4.1	9.6			608.659	66.0445	30.7942	104.19	429.572			457.577	10.7675	8.68322	54.4149	256.371			1.1	0.3	0	0	1.9
	13	2	0.5	12.4	10.7			444.611	61.4608	46.8015	215.876	318.859			239.158	11.6524	12.444	142.337	158.475			1.5	0	0	0.3	0.5
	17.7	2.1	2.6	5.2	10.9			853.023	145.985	52.9949	198.361	315.325			635.207	9.49193	13.4961	98.0529	156.673			1.1	0.3	0	0	0.9
	15.2	1.5	0.2	3	14.8			723.589	58.5642	40.2248	101.24	366.248			503.229	11.5889	5.58765	44.571	199.22			0.8	0	0	1	1.4
	10.7	2.3	0.9	4.5	14.5			232.686	101.506	44.9104	102.576	350.465			110.565	19.7184	9.75762	65.947	216.855			1.8	0	0	0.2	2.2
	17.5	1.1	0.5	5.7	7.5			260.14	57.1919	62.465	164.416	367.724			259.106	13.0126	26.6918	87.2336	216.685			1.9	0.2	0	1.4	1
	12.9	3.9	1.1	3.5	6.8			360.187	131.394	51.6422	185.119	273			206.814	32.7227	25.9127	85.323	148.246			1.6	0.2	0	1.4	0.4
	11	1	1.9	5.8	9.7			310.054	59.9104	62.4518	141.12	263.888			175.998	10.4203	17.3978	64.5334	178.249			2	0	0	0	1.2
	11.5	0.4	0.3	7	16.7			309.496	58.5319	42.6985	181.932	584.897			176.013	12.3598	21.5248	111.426	408.009			1	0	0	0.4	1.6
	12.6	1.5	0.7	6.2	11.3			337.643	60.2767	30.6033	638.129	272.214			197.157	12.401	7.77885	309.779	150.764			0.2	0	0	0	1.3
	19.5	1.7	0.2	5.6	8.6			287.515	45.3502	63.6204	369.606	191.908			169.767	8.29881	15.9183	162.552	131.628			1	0	0	1.3	1.5
	11.7	2.2	1.4	4.1	13.8			137.17	154.977	44.4683	243.122	346.442			48.1952	43.9601	19.6208	124.04	205.814			2	0	0	0.9	1.2
	13.3	0.8	1.1	9.8	10.4			492.222	53.2472	43.4148	736.207	465.672			306.439	7.29078	10.7606	589.459	255.69			0.6	0.1	0	0.1	1.1
	9.9	0.8	1.9		8.9			357.092	31.6368	103.574		629.029			219.468	10.6588	16.9375		409.704			1	0	0	0.8	1.1
	10.6	1.4	2		9.5			586.022	81.896	63.5688		259.526			372.61	21.8971	13.7351		158.088			1.9		0	0.7	1.6
		2.7	0.8						96.0351	28.3085						28.0112	5.50494					1.3		0.1	0	1.9
		4	1.6						229.343	41.016						69.1587	9.06988					1.5		0	1.3	1.7
			0.6							119.042							11.8666					1.6		0	0.3	1.2
			1.7							52.4735							18.4629							0	0.1	0.5
																								0	1.2
n	16	18	20	14	16		n	16	18	20	14	16		n	16	18	20	14	16					0	0
mean	12.9563	1.83889	1.055	5.60714	10.675		mean	436.419	86.4064	53.9652	244.867	348.795		mean	288.511	19.9861	13.8526	139.662	207.009						1.3
95% CI	1.47051	0.448494	0.303794	1.44765	1.42603		95% CI	98.8194	23.0322	9.84794	106.712	63.2185		95% CI	81.6862	7.29494	2.79024	77.2923	45.2771
																					n	19	15	22	23	20
Statistical test: One-way ANOVA (output from MATLAB)							Statistical test: One-way ANOVA (output from MATLAB)							Statistical test: One-way ANOVA (output from MATLAB)							mean	1.33684	0.0866667	0.00454545	0.556522	1.34
'Source'	'SS'	'df'	'MS'	'F'	'Prob>F'		'Source'	'SS'	'df'	'MS'	'F'	'Prob>F'		'Source'	'SS'	'df'	'MS'	'F'	'Prob>F'		95% CI	0.225427	0.0600812	0.00934376	0.216771	0.246856
'Groups'	1926.26	4	481.565	98.4079	6.96287e-30		'Groups'	1.89581e+06	4	473953	25.8017	1.07824e-13		'Groups'	983965	4	245991	23.3291	9.36374e-13
'Error'	386.591	79	4.89356				'Error'	1.45116e+06	79	18369.1				'Error'	833008	79	10544.4				Statistical test: One-way ANOVA (output from MATLAB)
'Total'	2312.85	83					'Total'	3.34697e+06	83					'Total'	1.81697e+06	83					'Source'	'SS'	'df'	'MS'	'F'	'Prob>F'
																					'Groups'	32.5694	4	8.14236	43.948	9.52042e-21
Multiple comparisons							Multiple comparisons							Multiple comparisons							'Error'	17.4156	94	0.185272
Group 1	Group 2	Lower 95% CI	Diff means	Upper 95% CI	p-value		Group 1	Group 2	Lower 95% CI	Diff means	Upper 95% CI	p-value		Group 1	Group 2	Lower 95% CI	Diff means	Upper 95% CI	p-value		'Total'	49.9851	98
Control	BAPTA	8.9954	11.1174	13.2393	9.92172e-09		Control	BAPTA	220.005	350.013	480.02	1.06679e-08		Control	BAPTA	170.025	268.525	367.025	1.04104e-08
Control	Thapsigargin	9.82982	11.9013	13.9727	9.92172e-09		Control	Thapsigargin	255.542	382.454	509.365	9.93491e-09		Control	Thapsigargin	178.504	274.659	370.813	1.00172e-08		Multiple comparisons
Control	U73122	5.08899	7.34911	9.60922	9.92237e-09		Control	U73122	53.0798	191.552	330.024	0.00208186		Control	U73122	43.9361	148.849	253.762	0.00149053		Group 1	Group 2	Lower 95% CI	Diff means	Upper 95% CI	p-value
Control	U73343	0.0977726	2.28125	4.46473	0.0361268		Control	U73343	-46.1531	87.6235	221.4	0.364713		Control	U73343	-19.8532	81.5024	182.858	0.174242		Control	BAPTA	0.83666	1.25018	1.66369	9.9259e-09
BAPTA	Thapsigargin	-1.22259	0.783889	2.79037	0.81082		BAPTA	Thapsigargin	-90.491	32.4412	155.373	0.947213		BAPTA	Thapsigargin	-87.0059	6.13345	99.2728	0.999739		Control	Thapsigargin	0.957342	1.3323	1.70725	9.92173e-09
BAPTA	U73122	-5.96899	-3.76825	-1.56752	7.66391e-05		BAPTA	U73122	-293.295	-158.461	-23.6267	0.0130087		BAPTA	U73122	-221.833	-119.676	-17.5194	0.0134141		Control	U73122	0.409163	0.78032	1.15148	7.19789e-07
BAPTA	U73343	-10.9581	-8.83611	-6.71415	9.92172e-09		BAPTA	U73343	-392.397	-262.389	-132.382	2.5686e-06		BAPTA	U73343	-285.523	-187.023	-88.523	9.96533e-06		Control	U73343	-0.386702	-0.00315789	0.380386	1
Thapsigargin	U73122	-6.7042	-4.55214	-2.40008	8.39411e-07		Thapsigargin	U73122	-322.754	-190.902	-59.0504	0.00112853		Thapsigargin	U73122	-225.707	-125.81	-25.9126	0.00637532		BAPTA	Thapsigargin	-0.318763	0.0821212	0.483005	0.97913
Thapsigargin	U73122	-11.6914	-9.62	-7.54857	9.92172e-09		Thapsigargin	U73122	-421.742	-294.83	-167.919	7.97734e-08		Thapsigargin	U73122	-289.311	-193.156	-97.002	2.86208e-06		BAPTA	U73122	-0.86719	-0.469855	-0.07252	0.0120548
U73122	U73343	-7.32797	-5.06786	-2.80774	1.94327e-07		U73122	U73343	-242.4	-103.928	34.5437	0.232382		U73122	U73343	-172.26	-67.3467	37.5663	0.385407		BAPTA	U73343	-1.66226	-1.25333	-0.844404	9.92409e-09
																					Thapsigargin	U73122	-0.909007	-0.551976	-0.194946	0.000394525
																					Thapsigargin	U73122	-1.70534	-1.33545	-0.965564	9.92173e-09
																					U73122	U73343	-1.14952	-0.783478	-0.417437	4.55054e-07
