# Supplementary material for: Purinergic signaling in cochlear supporting cells reduces hair cell excitability by increasing the extracellular space
Source: eLife. 2020 Jan 8;9:e52160. doi: 10.7554/eLife.52160 (PMC7015667; doi:10.7554/eLife.52160)
Supplement: Figure 3—figure supplement 1—source data 1. [file elife-52160-fig3-figsupp1-data1.xlsx]

## Sheet: Sheet1
Figure 3-Figure supplement 1 Source data
Experimental notes: performed in P6-8 mice, near physiological temperature (32-34C)
Panel C - Raw measured values (ISC frequency - events/min)							Panel C - Raw measured values (ISC amplitude -pA)							Panel C - Raw measured values (ISC integral -pC)							Panel G - Raw measured values (Crenations per minute)
	Control	MRS2500	MRS2500/Suramin/PPADS	Washout				Control	MRS2500	MRS2500/Suramin/PPADS	Washout				Control	MRS2500	MRS2500/Suramin/PPADS	Washout				Control	MRS2500 (paired)
	17.8	2.6	1.6	15.8				406.392	64.1546	34.7924	247.359				253.677	25.5039	13.8873	148.584				3.1	0.1
	15.6	1.8	0.6	13				222.521	45.2688	35.7626	129.452				122.002	13.5224	7.26845	64.0929				4.7	0.2
	21.2	10.8	9.4	14.8				373.589	64.4987	61.7952	124.373				216.428	25.4308	20.7465	60.7176				1.8	0.1
	20	0.6	0.6	11.4				522.98	56.4524	33.2187	103.999				374.637	29.2535	11.7523	52.7105				1.3	0
	18.6	2	2.4	12.6				278.071	50.1488	45.796	152.549				173.169	13.2425	7.31079	79.5818				2.1	0.2
																						1.9	0
n	5	5	5	5			n	5	5					n	5	5					n	6	6
mean	18.64	3.56	2.92	13.52			mean	360.71	56.1046					mean	227.983	21.3906					mean	2.48333	0.1
95% CI	1.87748	3.6042	3.24337	1.54626			95% CI	102.322	7.44104					95% CI	83.7726	6.55002					95% CI	0.989625	0.0715678
Statistical test: one-way ANOVA							Statistical test: one-way ANOVA							Statistical test: one-way ANOVA							Statistical test: two-tailed paired Student's t test
'Source'	'SS'	'df'	'MS'	'F'	'Prob>F'		'Source'	'SS'	'df'	'MS'	'F'	'Prob>F'		'Source'	'SS'	'df'	'MS'	'F'	'Prob>F'		p-value	0.00430284
'Columns'	890.888	3	296.963	31.0144	6.68896e-07		'Columns'	323972	3	107991	25.3946	2.52851e-06		'Columns'	149021	3	49673.6	18.5038	1.87635e-05
'Error'	153.2	16	9.575				'Error'	68040.2	16	4252.51				'Error'	42952.1	16	2684.51
'Total'	1044.09	19					'Total'	392012	19					'Total'	191973	19
Multiple comparisons							Multiple comparisons							Multiple comparisons
Control	MRS2500	9.48087	15.08	20.6791	4.92701e-06		Control	MRS2500	186.608	304.606	422.603	8.40543e-06		Control	MRS2500	112.839	206.592	300.345	5.63971e-05
Control	MRS2500/Suramin/PPADS	10.1209	15.72	21.3191	2.89304e-06		Control	MRS2500/Suramin/PPADS	200.44	318.437	436.435	4.80322e-06		Control	MRS2500/Suramin/PPADS	122.037	215.79	309.542	3.39046e-05
Control	Washout	-0.479126	5.12	10.7191	0.0792957		Control	Washout	91.1661	209.164	327.162	0.000591797		Control	Washout	53.0928	146.845	240.598	0.00192743
MRS2500	MRS2500/Suramin/PPADS	-4.95913	0.64	6.23913	0.987466		MRS2500	MRS2500/Suramin/PPADS	-104.166	13.8317	131.829	0.986515		MRS2500	MRS2500/Suramin/PPADS	-84.555	9.19757	102.95	0.991977
MRS2500	Washout	-15.5591	-9.96	-4.36087	0.0005713		MRS2500	Washout	-213.44	-95.4419	22.5558	0.136217		MRS2500	Washout	-153.499	-59.7467	34.0059	0.298909
MRS2500/Suramin/PPADS	Washout	-16.1991	-10.6	-5.00087	0.000301257		MRS2500/Suramin/PPADS	Washout	-227.271	-109.274	8.72417	0.0745536		MRS2500/Suramin/PPADS	Washout	-162.697	-68.9442	24.8083	0.193859
																																			-12.5732
																																			2.88391
