# Supplementary material for: Purinergic signaling in cochlear supporting cells reduces hair cell excitability by increasing the extracellular space
Source: eLife. 2020 Jan 8;9:e52160. doi: 10.7554/eLife.52160 (PMC7015667; doi:10.7554/eLife.52160)
Supplement: Figure 3—figure supplement 2—source data 1. [file elife-52160-fig3-figsupp2-data1.xlsx]

## Sheet: Sheet1
Figure 3-Figure supplement 2 Source data
Experimental notes: performed in P6-8 mice, near physiological temperature (32-34C)
Panel B - Raw measured values (ISC frequency - events/min)							Panel B - Raw measured values (ISC amplitude -pA)							Panel B - Raw measured values (ISC integral -pC)							Panel D - Raw measured values (Crenations per minute)						Panel D - Raw measured values (Crenations areas)
	Control	P2ry1 KO						Control	P2ry1 KO						Control	P2ry1 KO						Control	P2ry1 KO					Control	P2ry1 KO
	13.8	26.6						250.621	142.113						129.319	27.3597						0.9	0.3					1248.29	482.813
	15.8	19.8						248.868	97.3523						129.281	49.8599						1.7	1.4					693.519	337.443
	19.8	10.4						558.137	51.4791						348.081	26.5519						1.8	1.6					796.048	470.119
	13.8	11.4						346.769	56.8031						216.441	10.3161						2.8	1.9					590.248	282.439
	8	21.8						186.13	99.0017						67.5757	0.699128						1.2	0.4					761.034	947.215
	12	4.2						290.54	44.2985						155.11	1.36759						1.3	0.5					954.047	198.497
	14.4	17.6						248.192	88.7335						125.474	9.17102						1.4						735.43
	9.8	2.2						353.259	46.7667						226.013	5.48589						0.9						1184.74
	15.2	19.8						331.416	128.438						196.172	24.827
	15.6	14.2						407.402	100.553						220.076	8.86723					n	8	6				n	8	6
	17.8	26						406.392	176.748						253.677	26.4832					mean	1.5	1.01667				mean	870.419	453.088
	15.6	10.4						222.521	98.6277						122.002	30.3142					95% CI	0.428767	0.557624				95% CI	164.417	212.499
	21.2	9.6						373.589	57.2332						216.428	16.3417
	20	14.6						522.98	56.9054						374.637	43.5446					Statistical test: two-tailed Student's t test						Statistical test: two-tailed Student's t test
	18.6							278.071							173.169						p-value	0.195263					p-value	0.00922847
	15							181.133							85.9708
	9.2							146.611							68.1943
n	17	14					n	17	14					n	17	14
mean	15.1444	14.84					mean	298.313	83.9369					mean	173.59	19.6793
95% CI	1.80457	3.89893					95% CI	54.6943	20.9215					95% CI	41.8808	7.94865
Statistical test: two-tailed Student's t test							Statistical test: two-tailed Student's t test							Statistical test: two-tailed Student's t test
p-value	0.948249						p-value	1.09694e-07						p-value	1.78393e-07
																																			-12.5732
																																			2.88391
Panel F - Raw measured values (ISC frequency - events/min)							Panel F - Raw measured values (ISC amplitude -pA)							Panel F - Raw measured values (ISC integral -pC)
	Control	MRS2500	MRS2500/Suramin/PPADS					Control	MRS2500	MRS2500/Suramin/PPADS					Control	MRS2500	MRS2500/Suramin/PPADS
	15.2	10.2	10.4					45.9876	45.1989	38.5397					18.2919	12.4171	13.2179
	17.2	11	9					46.3137	67.1908	58.0046					20.3725	42.5685	31.4883
	25	17.4	15.8					96.2479	102.968	79.0312					46.1055	51.7598	43.1243
	7.6	7.4	8.2					35.8429	42.1972	39.7276					12.3177	12.6427	15.6993
	20.8	21	16.2					83.0957	60.3054	52.2103					37.7045	29.6937	22.6164
n	5	5	5				n	5	5	5				n	5	5	5
mean	17.16	13.4	11.92				mean	61.4975	63.572	53.5027				mean	26.9584	29.8163	25.2292
95% CI	5.71342	4.91478	3.33908				95% CI	23.2044	21.3368	14.4512				95% CI	12.511	15.4441	10.747
Statistical test: one-way ANOVA							Statistical test: one-way ANOVA							Statistical test: one-way ANOVA
'Source'	'SS'	'df'	'MS'	'F'	'Prob>F'		'Source'	'SS'	'df'	'MS'	'F'	'Prob>F'		'Source'	'SS'	'df'	'MS'	'F'	'Prob>F'
'Columns'	72.976	2	36.488	1.23772	0.324561		'Columns'	282.688	2	141.344	0.27091	0.767228		'Columns'	53.6658	2	26.8329	0.121139	0.886981
'Error'	353.76	12	29.48				'Error'	6260.87	12	521.739				'Error'	2658.07	12	221.506
'Total'	426.736	14					'Total'	6543.55	14					'Total'	2711.74	14
