# Supplementary material for: Purinergic signaling in cochlear supporting cells reduces hair cell excitability by increasing the extracellular space
Source: eLife. 2020 Jan 8;9:e52160. doi: 10.7554/eLife.52160 (PMC7015667; doi:10.7554/eLife.52160)
Supplement: Figure 3—source data 1. [file elife-52160-fig3-data1.xlsx]

## Sheet: Sheet1
Figure 3 Source data
Experimental notes: performed in P6-8 mice, room temperature
Panel C - Raw measured values (ISC frequency - events/min)							Panel C - Raw measured values (ISC amplitude -pA)							Panel C - Raw measured values (ISC integral -pC)							Panel E - Raw measured values (Crenations per minute)							Panel E - Raw measured values (Crenations area)
	Control	MRS2500 (paired)						Control	MRS2500 (paired)						Control	MRS2500 (paired)						Control	MRS2500 (paired)						Control	MRS2500 (paired)
	4.6	1.2						157.046	34.9895						59.479	12.7676						0.5	0.25						601.093	386.326
	3	0.2						173.625	119.79						76.6291	6.36791						1.625	0						479.726	NaN	*NaN because no crenations were observed
	4.2	2.6						199.513	51.4156						109.395	21.178						1.375	0.125						764.962	136.411
	3.8	1						230.357	33.9685						112.276	9.7131						0.625	0.125						1145.46	80.6034
	5.8	2.8						263.796	38.9725						180.828	15.7787						1.125	0						504.233	NaN
	7	4						352.796	60.281						223.896	26.2844						1.25	0						823.728	NaN
	7	4						426.106	86.3919						308.5	36.2915						3.125	0.375						1025.8	291.389
	5.8	3.2						443.534	72.6409						237.276	28.8091						2.625	1.125						773.974	230.253
	5.2	0.4						395.906	28.5657						187.776	9.92523
n	9	9					n	9	9					n	9	9					n	8	8					n	8	5
mean	5.15556	2.15556					mean	293.631	58.5572					mean	166.228	18.5684					mean	1.53125	0.25					mean	764.872	224.996
95% CI	0.904745	0.970744					95% CI	73.3314	19.6263					95% CI	54.0998	6.6495					95% CI	0.636096	0.261911					95% CI	164.096	106.597
Statistical test: two-tailed paired Student's t test							Statistical test: two-tailed paired Student's t test							Statistical test: two-tailed paired Student's t test							Statistical test: two-tailed paired Student's t test							Statistical test: two-tailed paired Student's t test
p-value	4.91013e-06						p-value	0.000272095						p-value	0.000350388						p-value	0.00201224						p-value	0.00983965
Panel G - Raw measured values (IHC frequency - events/min)							Panel G - Raw measured values (IHC amplitude - events/min)							Panel I - Raw measured values (change in baseline pA)							Panel K - Raw measured values (change in holdoing current pA)
	Control	MRS2500 (paired)						Control	MRS2500 (paired)						+MRS2500'	+MRS2500/K+inhibition'						aCSF	+MRS2500'	Cs-TEA:aCSF	Cs-TEA:+MRS2500
	1.6	0.1						15.5981	5.46518						-117.493	105.286						6.36291	-11.322	-1.83105	2.05994
	1.8	0.2						23.5048	5.75399						-122.986	72.0215						-7.04956	-25.1465	0.473022	-7.87353
	5.5	0						38.4498	0						-101.929	-9.76562						-4.69971	-15.0452	-2.92969	0.12207
	3.2	0						21.758	0						-57.9834	63.1714						0.366211	-21.2402	8.20923	-1.25122
	2.9	0.1						23.7076	10.3079						-118.103	124.817						-3.02124	-13.5498		-2.70081
	2.9	0.2						18.7442	8.46207						-36.3159	218.201							-12.5732		2.88391
n	6	6					n	6	6					n	6	6					n	5	6	4	6
mean	2.98333	0.1					mean	23.6271	4.99819					mean	-92.4683	95.6217					mean	-1.60828	-16.4795	0.980377	-1.12661
95% CI	1.11496	0.0715678					95% CI	6.31596	3.41252					95% CI	29.1731	60.6089					95% CI	4.56717	4.3867	4.92293	3.11571
Statistical test: two-tailed paired Student's t test							Statistical test: two-tailed paired Student's t test							Statistical test: two-tailed Student's t test							Statistical test: one-way ANOVA
p-value	0.00462286						p-value	0.00798461						p-value	0.000269017						'Source'	'SS'	'df'	'MS'	'F'	'Prob>F'
																					'Groups'	1080.19	3	360.064	14.915	5.16211e-05
																					'Error'	410.398	17	24.1411
																					'Total'	1490.59	20
																					Multiple comparisons
																					aCSF	+MRS2500'	6.41408	14.8712	23.3284	0.000578577
																					aCSF	Cs-TEA:aCSF	-11.9577	-2.58865	6.78036	0.860038
																					aCSF	Cs-TEA:+MRS2500	-8.93881	-0.481669	7.97547	0.998428
																					+MRS2500'	Cs-TEA:aCSF	-26.4752	-17.4599	-8.44453	0.000206417
																					+MRS2500'	Cs-TEA:+MRS2500	-23.4164	-15.3529	-7.28932	0.000248897
																					Cs-TEA:aCSF	Cs-TEA:+MRS2500	-6.90835	2.10698	11.1223	0.909001
