# Supplementary material for: Purinergic signaling in cochlear supporting cells reduces hair cell excitability by increasing the extracellular space
Source: eLife. 2020 Jan 8;9:e52160. doi: 10.7554/eLife.52160 (PMC7015667; doi:10.7554/eLife.52160)
Supplement: Figure 4—source data 1. [file elife-52160-fig4-data1.xlsx]

## Sheet: Sheet1
Figure 4 - Source data
Experimental notes: performed in P6-8 mice, room temperature
Panel C - Raw measured values (MRS2365 currents -nA)
	Control	P2ry1 KO
	1.3688	0.0880125
	3.27153	0.127713
	0.86728	0.0134596
	1.6796	0.0248367
	5.56868	0.0704942
	3.78402	0.120992
	1.20143	0.20457
	0.807275	0
n	8	8
mean	2.31858	0.0812598
95% CI	1.1878	0.0479284
Statistical test: two-tailed Student's t test
p-value	0.00243094
