# Supplementary material for: Purinergic signaling in cochlear supporting cells reduces hair cell excitability by increasing the extracellular space
Source: eLife. 2020 Jan 8;9:e52160. doi: 10.7554/eLife.52160 (PMC7015667; doi:10.7554/eLife.52160)
Supplement: Figure 5—figure supplement 1—source data 1. [file elife-52160-fig5-figsupp1-data1.xlsx]

## Sheet: Sheet1
Figure 5-Figure supplement 1 Source data
Experimental notes: performed in P5+1DIV mice, room temperature
Panel B - Raw measured values (Ca2+ events per minute)						Panel C - Raw measured values (Ca2+ event area)						Panel E - Raw measured values (Corr coefficient)
	Control	P2ry1 KO					Control	P2ry1 KO					Control	P2ry1 KO
	2.9	0.4					2792.45	748.062					0.754031	0.15935
	2.4	1.2					2508.21	1107.82					0.529854	0.194951
	3	0.5					2858.14	1065.8					0.764722	0.179452
	2.8	0.7					3211.47	704.357					0.73922	0.116573
	2.7	0.4					2669.26	605.875					0.545967	0.160861
n	5	5				n	5	5				n	5	5
mean	2.76	0.64				mean	2807.91	846.384				mean	0.666759	0.162237
95% CI	0.201791	0.294647				95% CI	229.687	198.033				95% CI	0.103524	0.0257868
Statistical test: two-tailed Student's t test						Statistical test: two-tailed Student's t test						Statistical test: two-tailed Student's t test
p-value	2.7119e-06					p-value	1.40974e-06					p-value	1.49203e-05
