# Supplementary material for: Purinergic signaling in cochlear supporting cells reduces hair cell excitability by increasing the extracellular space
Source: eLife. 2020 Jan 8;9:e52160. doi: 10.7554/eLife.52160 (PMC7015667; doi:10.7554/eLife.52160)
Supplement: Figure 5—source data 1. [file elife-52160-fig5-data1.xlsx]

## Sheet: Sheet1
Figure 5 - Source data
Experimental notes: performed in P6-8 mice, room temperature
Panel C - Raw measured values (events per minute - ISCs)						Panel C - Raw measured values (events per minute - IHCs)						Panel C - Raw measured values (events per minute - SGNs)
	Control	MRS2500					Control	MRS2500					Control	MRS2500
	1	0					1.06667	0					0.333333	0
	1.2	0					1.46667	0.4					0.6	0
	0.866667	0.2					0.733333	0.2					0.6	0
	1.2	0					1.4	0					0.533333	0
	0.666667	0					1.06667	0					0.2	0
n	5	5				n	5	5				n	5	5
mean	0.986667	0.04				mean	1.14667	0.12				mean	0.453333	0
95% CI	0.199878	0.0783986				95% CI	0.259361	0.156797				95% CI	0.156797	#NUM!
Statistical test: two-tailed Student's t test						Statistical test: two-tailed Student's t test						Statistical test: two-tailed Student's t test
p-value	2.49532e-05					p-value	0.000162583					p-value	0.000472218
Panel F - Raw measured values (correlation coefficient)
	Baseline	Shuffled	+MRS2500	+MRS2500 shuffled
	0.754031	0.273505	0.13635	0.060366
	0.529854	0.149576	0.0346679	0.0326179
	0.764722	0.330557	0.18489	0.0772037
	0.73922	0.163837	0.0821049	0.0234696
	0.545967	0.157037	0.121775	0.026057
n	5	5
mean	0.666759	0.214902
95% CI	0.103524	0.0720586
Statistical test: two-tailed Student's t test
p-value	0.000224148	Baseline vs baseline shuffled
p-value	0.000193797	Baseline vs MRS2500
p-value	0.0212653	MRS vs MRS2500 shuffled
Bonferroni correction		0.0166667
