# Supplementary material for: Purinergic signaling in cochlear supporting cells reduces hair cell excitability by increasing the extracellular space
Source: eLife. 2020 Jan 8;9:e52160. doi: 10.7554/eLife.52160 (PMC7015667; doi:10.7554/eLife.52160)
Supplement: Figure 6—source data 1. [file elife-52160-fig6-data1.xlsx]

## Sheet: Sheet1
Figure 6 Source data
Experimental notes: performed in P5+2DIV mice, room temperature
Panel E - Raw measured values (Bursts per minute)						Panel E - Raw measured values (Aps per burst)						Panel E - Raw measured values (burst duration)						Panel E - Raw measured values (AP frequency)						Panel E - Raw measured values (CV)
	Control	MRS2500					Control	MRS2500					Control	MRS2500					Control	MRS2500					Control	MRS2500
	0.3	0.03					17.3333	NaN	*NaNs indicate no bursts in MRS				2.80827						0.201667	0.198333					1.93221	1.06683
	0.7	0.07					42.1429	14.6667					5.13507	3.18628					0.821667	0.71					2.92227	1.51608
	0.2	0.02					65	11					5.7975	3.4284					0.373333	0.43					2.47453	1.1115
	0.5	0.05					31.2	NaN					4.6378						0.386667	0.446667					2.61829	1.09998
	0.3	0.03					71	15					6.60937	4.78155					0.551667	0.408333					3.4794	2.15334
	0.4	0.04					22.25	NaN					3.11927						0.508333	0.241667					2.24657	1.81601
	0.5	0.05					42.6	21					5.25188	5.56366					0.606667	0.695					3.43139	1.74627
n	7	7				n	7	4				n	7	4				n	7	7				n	7	7
mean	0.4	0.04				mean	41.4877	13.5556				mean	4.68455	3.79874				mean	0.473889	0.405833				mean	2.61221	1.46062
95% CI	0.132518	0.0132518				95% CI	16.5103	2.17501				95% CI	1.10472	0.842491				95% CI	0.155394	0.134483				95% CI	0.400748	0.333976
Statistical test: paired two-tailed Student's t test						Statistical test: paired two-tailed Student's t test						Statistical test: paired two-tailed Student's t test						Statistical test: paired two-tailed Student's t test						Statistical test: paired two-tailed Student's t test
p-value	0.000611189					p-value	0.0207835					p-value	0.0937284					p-value	0.393958					p-value	0.000286773
Panel H - Raw measured values (Bursts per minute)						Panel H - Raw measured values (Aps per burst)						Panel H - Raw measured values (burst duration)						Panel H - Raw measured values (AP frequency)						Panel H - Raw measured values (CV)
	Control	P2ry1 KO					Control	P2ry1 KO					Control	P2ry1 KO					Control	P2ry1 KO					Control	P2ry1 KO
	0.7	0.07					42.1429	24	*NaNs indicate no bursts in P2ry1 KO				5.13507	8.01407					0.821667	0.338333					2.92227	2.05448
	0.2	0.02					65	13					5.7975	2.98305					0.373333	0.671667					2.47453	1.43322
	0.5	0.05					31.2	NaN					4.6378						0.386667	0.236667					2.61829	1.68366
	0.3	0.03					71	19.25					6.60937	4.76069					0.551667	0.876667					3.4794	1.59184
	0.4	0.04					22.25	16					3.11927	3.38155					0.508333	0.681667					2.24657	1.79671
	0.5	0.05					42.6	NaN					5.25188						0.606667	0.465					3.43139	1.42356
	0.3	0.03					23	NaN					4.61644						0.391667	0.393333					2.14456	1.8833
	0.4	0.04					21.75	13					3.11194	3.9268					0.393333	0.973333					2.15015	1.68364
	0.3	0.03					18.6667	NaN					4.23427						0.306667	0.233333					1.37818	1.73041
		0						NaN												0.318333						1.50144
		0						26.6667						5.76792						0.49						2.22076
n	9	11				n	9	6				n	9	6				n	9	11				n	9	11
mean	0.4	0.0327273				mean	37.5122	18.6528				mean	4.72373	4.80568				mean	0.482222	0.516212				mean	2.53837	1.72755
95% CI	0.0979982	0.0124215				95% CI	12.6754	4.58421				95% CI	0.751583	1.49027				95% CI	0.104358	0.149243				95% CI	0.436911	0.148519
Statistical test: two-tailed Student's t test						Statistical test: two-tailed Student's t test						Statistical test: two-tailed Student's t test						Statistical test: two-tailed Student's t test						Statistical test: two-tailed Student's t test
p-value	2.15347e-07					p-value	0.039416					p-value	0.917135					p-value	0.583305					p-value	0.00235869
