# Supplementary material for: Purinergic signaling in cochlear supporting cells reduces hair cell excitability by increasing the extracellular space
Source: eLife. 2020 Jan 8;9:e52160. doi: 10.7554/eLife.52160 (PMC7015667; doi:10.7554/eLife.52160)
Supplement: Figure 7—figure supplement 1—source data 1. [file elife-52160-fig7-figsupp1-data1.xlsx]

## Sheet: Sheet1
Figure 7-Figure supplement 1 Source data
Experimental notes: performed in P6-8 mice, awake
Panel C - Raw measured values (Events per minute)
	Control	Bilateral ablation
	8.05	0
	4.8	1.75
	7.7	0.4
	6.1	0.9
	5.9	0.25
	8.35	0.8
	5.65
n	7	6
mean	6.65	0.683333
95% CI	1.01393	0.497555
Statistical test: two-tailed Student's t test
p-value	9.04193e-07	Baseline v sham
