# Supplementary material for: Purinergic signaling in cochlear supporting cells reduces hair cell excitability by increasing the extracellular space
Source: eLife. 2020 Jan 8;9:e52160. doi: 10.7554/eLife.52160 (PMC7015667; doi:10.7554/eLife.52160)
Supplement: Figure 7—source data 1. [file elife-52160-fig7-data1.xlsx]

## Sheet: Sheet1
Figure 7 Source data
Experimental notes: performed in P6-8 mice, awake
Panel D - Raw measured values (Events per minute)						Panel D - Raw measured values (Amplitude)						Panel D - Raw measured values (Half-width)						Panel D - Raw measured values (Amplitude Ratio)						Panel D - Raw measured values (Amplitude CV)
	Control	P2ry1 KO					Control	P2ry1 KO					Control	P2ry1 KO					Control	P2ry1 KO					Control	P2ry1 KO
	8.8	11.8					5.24656	7.7225					1.52027	1.4755					0.651009	0.435596					0.769993	1.03999
	14.9	7.9					11.3176	5.37648					1.46728	1.32529					0.621245	0.385835					0.682935	0.916213
	15.1	10.8					9.65662	12.8364					1.64596	1.75127					0.60519	0.459675					0.747086	0.954285
	15.1	9.4					8.08168	6.6406					1.48521	1.53361					0.614378	0.394802					0.677963	1.01262
	13.1	9.2					5.99978	7.85186					1.37709	1.52614					0.618051	0.404769					0.710734	1.2587
	14.9	11.3					7.56782	10.4974					1.46972	1.61043					0.557973	0.501389					0.721466	0.81279
	13.8	8.1					10.9037	11.0667					1.48791	1.97264					0.678379	0.501371					0.694934	0.932704
	14.1						11.3406						1.63883						0.666307						0.646708
	11.1						9.23629						2.27782						0.541697						0.684925
n	9	7				n	9	7				n	9	7				n	9	7				n	9	7
mean	13.4333	9.78571				mean	8.81675	8.85599				mean	1.59668	1.59927				mean	0.617137	0.440491				mean	0.704082	0.989615
95% CI	1.41373	1.14239				95% CI	1.47256	1.977				95% CI	0.175812	0.155001				95% CI	0.0298275	0.0359849				95% CI	0.0246753	0.103276
Statistical test: two-tailed Student's t test						Statistical test: two-tailed Student's t test						Statistical test: two-tailed Student's t test						Statistical test: two-tailed Student's t test						Statistical test: two-tailed Student's t test
p-value	0.00208855					p-value	0.974991					p-value	0.983569					p-value	3.01708e-06					p-value	3.70499e-05
Panel H - Raw measured values (Events per minute)
	Control M	P2ry1 M	Control L	P2ry1 L
	10	15.4	6	7.6
	9.2	12.3	12.6	2.4
	19.5	18	10.4	4.3
	17.5	18.3	11	4.5
	14.9	16.5	9.8	2.7
	18.3	12.8	11.6	7
	13	9.1	12.7	2.3
	13.8		9.8
	11.5		10
n	9	7	9	7
mean	14.1889	14.6286	10.4333	4.4
95% CI	2.39833	2.49892	1.30991	1.60942
Statistical test: two-tailed Student's t test
p-value	0.809244	Medial comparison
p-value	4.93659e-05
