# Supplementary material for: Purinergic signaling in cochlear supporting cells reduces hair cell excitability by increasing the extracellular space
Source: eLife. 2020 Jan 8;9:e52160. doi: 10.7554/eLife.52160 (PMC7015667; doi:10.7554/eLife.52160)
Supplement: Figure 8—source data 1. [file elife-52160-fig8-data1.xlsx]

## Sheet: Sheet1
Figure 8 Source data
Experimental notes: performed in P6-8 mice, awake
Panel D - Raw measured values (Events per minute)						Panel D - Raw measured values (Amplitude)						Panel E - Raw measured values (SC waves per minute)						Panel E - Raw measured values (SC wave duration)
	Baseline	Sham	Baseline	MRS2500			Baseline	Sham	Baseline	MRS2500			Baseline	Sham	Baseline	MRS2500			Baseline	Sham	Baseline	MRS2500
	15.2	14.8	13.6	1.2			9.58496	11.2548	9.75776	2.51409			3.2	2.8	3.2	3.2			22.6562	19.8714	16.7125	14.9187
	16	16	13	3.2			9.91768	10.1073	10.4038	4.68835			2.8	4	3	3			18.8	17.35	24.0667	18.9467
	13.4	12.4	14.4	4.4			10.4299	10.173	10.8506	5.59309			3	3.2	2.4	2.4			23.5933	22.5437	17.5167	20.9667
	12.6	11.8	15	7.8			10.7534	11.4057	10.5119	7.55457			2.2	2.6	2.4	3.6			25.4455	22.0846	24.1417	18.8389
	11	10.2	10.6	2.8			10.6859	11.0247	8.30947	4.11707			3	2	2.6	2.4			27.0133	31.42	18.6692	20.0833
n	5	5	5	5		n	5	5	5	5		n	5	5	5	5		n	5	5	5	5
mean	13.64	13.04	13.32	3.88		mean	10.2744	10.7931	9.96669	4.89344		mean	2.84	2.92	2.72	2.92		mean	23.5017	22.654	20.2213	18.7509
95% CI	1.75917	2.04964	1.4906	2.16698		95% CI	0.443824	0.536181	0.883024	1.63262		95% CI	0.337205	0.651227	0.318456	0.457138		95% CI	2.7348	4.6599	3.16617	2.02818
Statistical test: paired two-tailed Student's t test						Statistical test: paired two-tailed Student's t test						Statistical test: paired two-tailed Student's t test						Statistical test: paired two-tailed Student's t test
p-value	0.674796	Baseline v sham				p-value	0.18223	Baseline v sham				p-value	0.836045	Baseline v sham				p-value	0.766312	Baseline v sham
p-value	0.0005077	Baseline v MRS				p-value	0.0021551	Baseline v MRS				p-value	0.473427	Baseline v MRS				p-value	0.44595	Baseline v MRS
Panel H - Raw measured values (Events per minute)
	Control M	MRS M	Control L	MRS L
	14.2	0.6	7.8	0.8
	16.8	2.2	9.2	1.8
	14.4	3	8.4	2.4
	15.2	7	9.8	2.4
	9.2	3	4.8	0.4
n	5	5	5	5
mean	13.96	3.16	8	1.56
95% CI	2.49893	2.0683	1.70415	0.807163
Statistical test: two-tailed Student's t test
p-value	0.000183129	Medial comparison
p-value	0.000153682
