# Supplementary figures and images for: Purinergic signaling in cochlear supporting cells reduces hair cell excitability by increasing the extracellular space
Source: eLife journal article supplement (doi:10.7554/elife.52160), 2020-01-08

**A**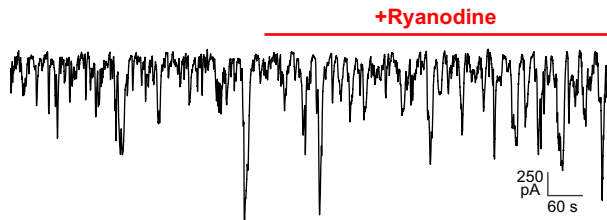**B**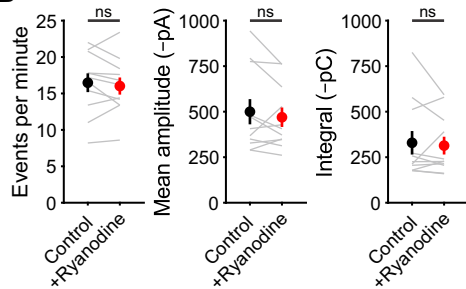**C**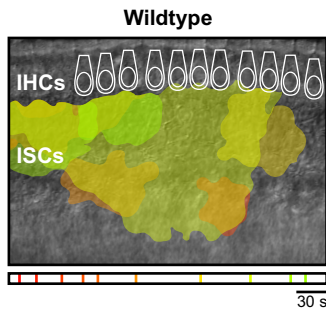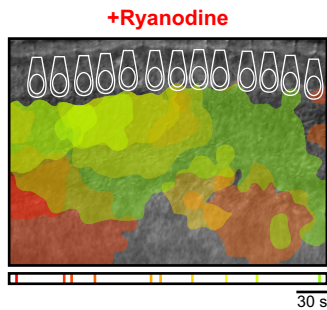**D**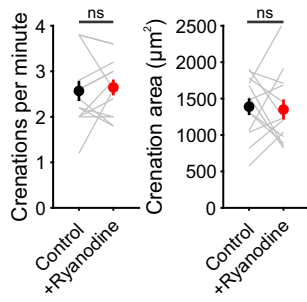

Supplement: supp [file elife_poa_e52160_Figure_1_figure_supplement_1.pdf › elife_poa_e52160_Figure_1_figure_supplement_1.pdf]

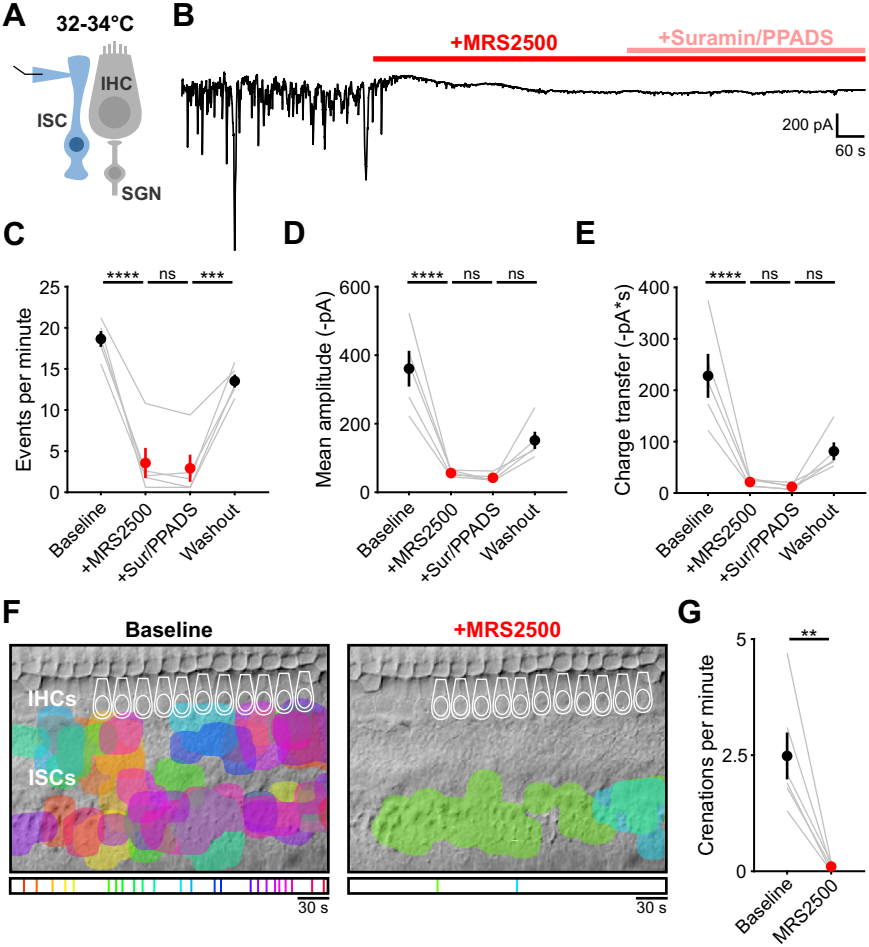

Supplement: supp [file elife_poa_e52160_Figure_3_figure_supplement_1.pdf › elife_poa_e52160_Figure_3_figure_supplement_1.pdf]

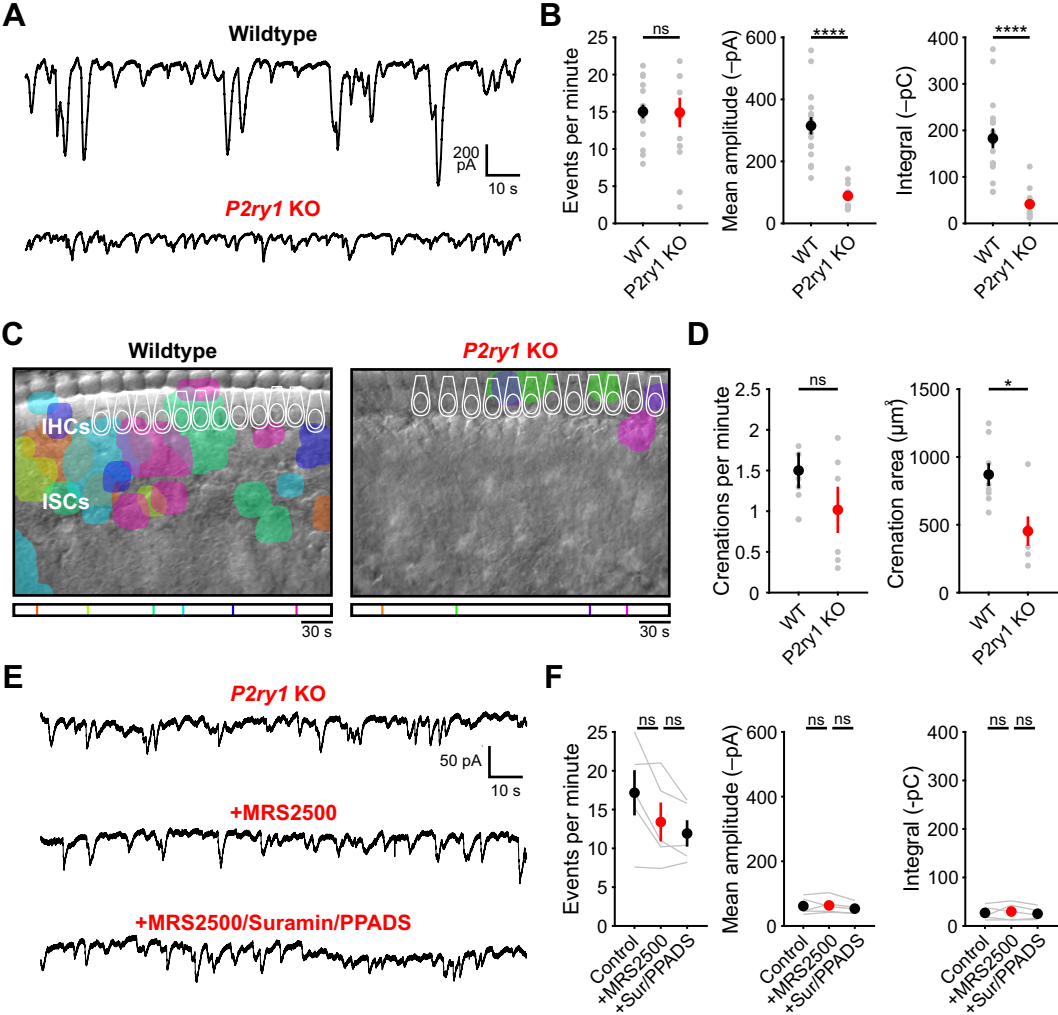

Supplement: supp [file elife_poa_e52160_Figure_3_figure_supplement_2.pdf › elife_poa_e52160_Figure_3_figure_supplement_2.pdf]

**A*****Tecta* locus**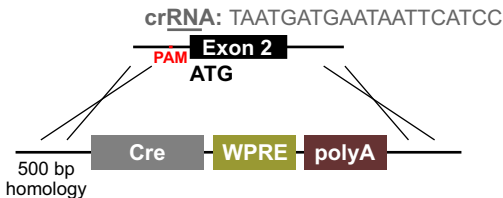**B**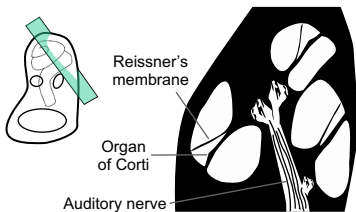**C*****Tecta*<sup>Cre</sup>;R26-*Isl*-TdT**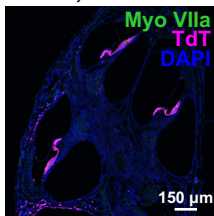**D**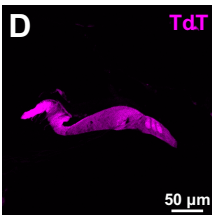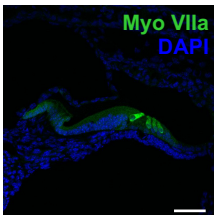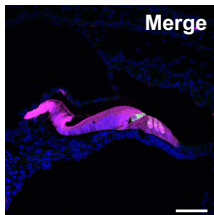

Supplement: supp [file elife_poa_e52160_Figure_4_figure_supplement_1.pdf › elife_poa_e52160_Figure_4_figure_supplement_1.pdf]

**A****Control**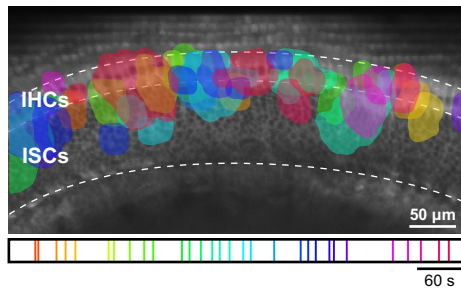***P2ry1* KO**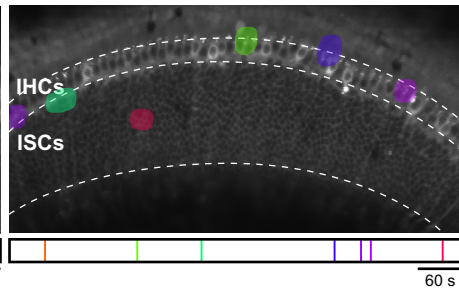**B**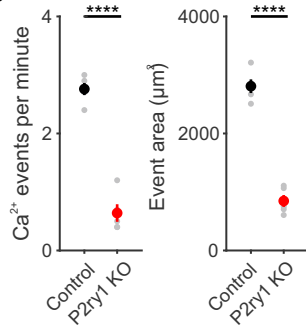**C**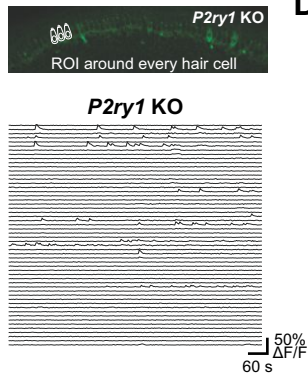**D**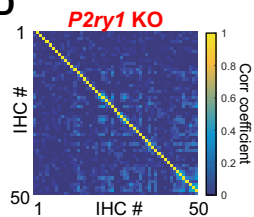**E**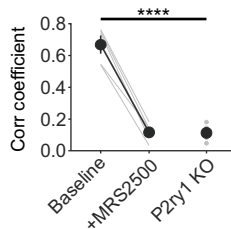

Supplement: supp [file elife_poa_e52160_Figure_5_figure_supplement_1.pdf › elife_poa_e52160_Figure_5_figure_supplement_1.pdf]

**A***P2ry1* KO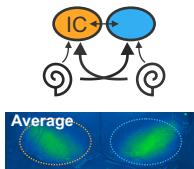**B***P2ry1* KO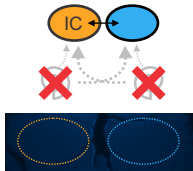**C**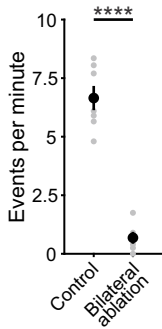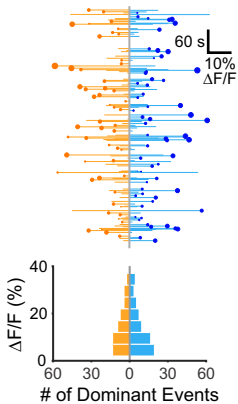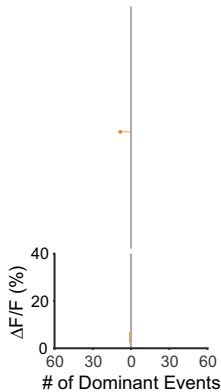

Supplement: supp [file elife_poa_e52160_Figure_7_figure_supplement_1.pdf › elife_poa_e52160_Figure_7_figure_supplement_1.pdf]
